# Supplementary material for: Physiological effects of increased foraging effort in a small passerine
Source: Oxford University Press journal article supplement (doi:10.1242/jeb.160812), 2017-01-01
Supplement: jeb160812supp.pdf [file jeb160812supp.pdf]

Fig. S1. Picture of high foraging cost treatment (HF) cage setup.

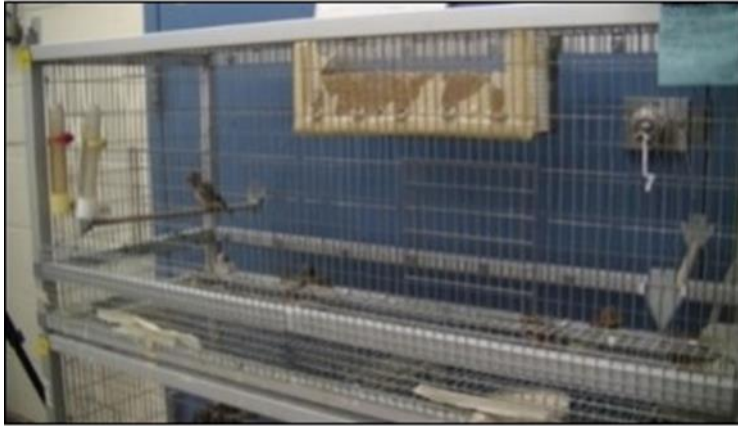

Fig S2. Plot of all tissue masses in (A) females and (B) males. Filled circles represent CTR birds; Filled triangles represent HF birds. “lint” = large intestine; “sint” = small intestine”; “pect”=flight muscle. Data shown are least-squared means  $\pm$  s.e.

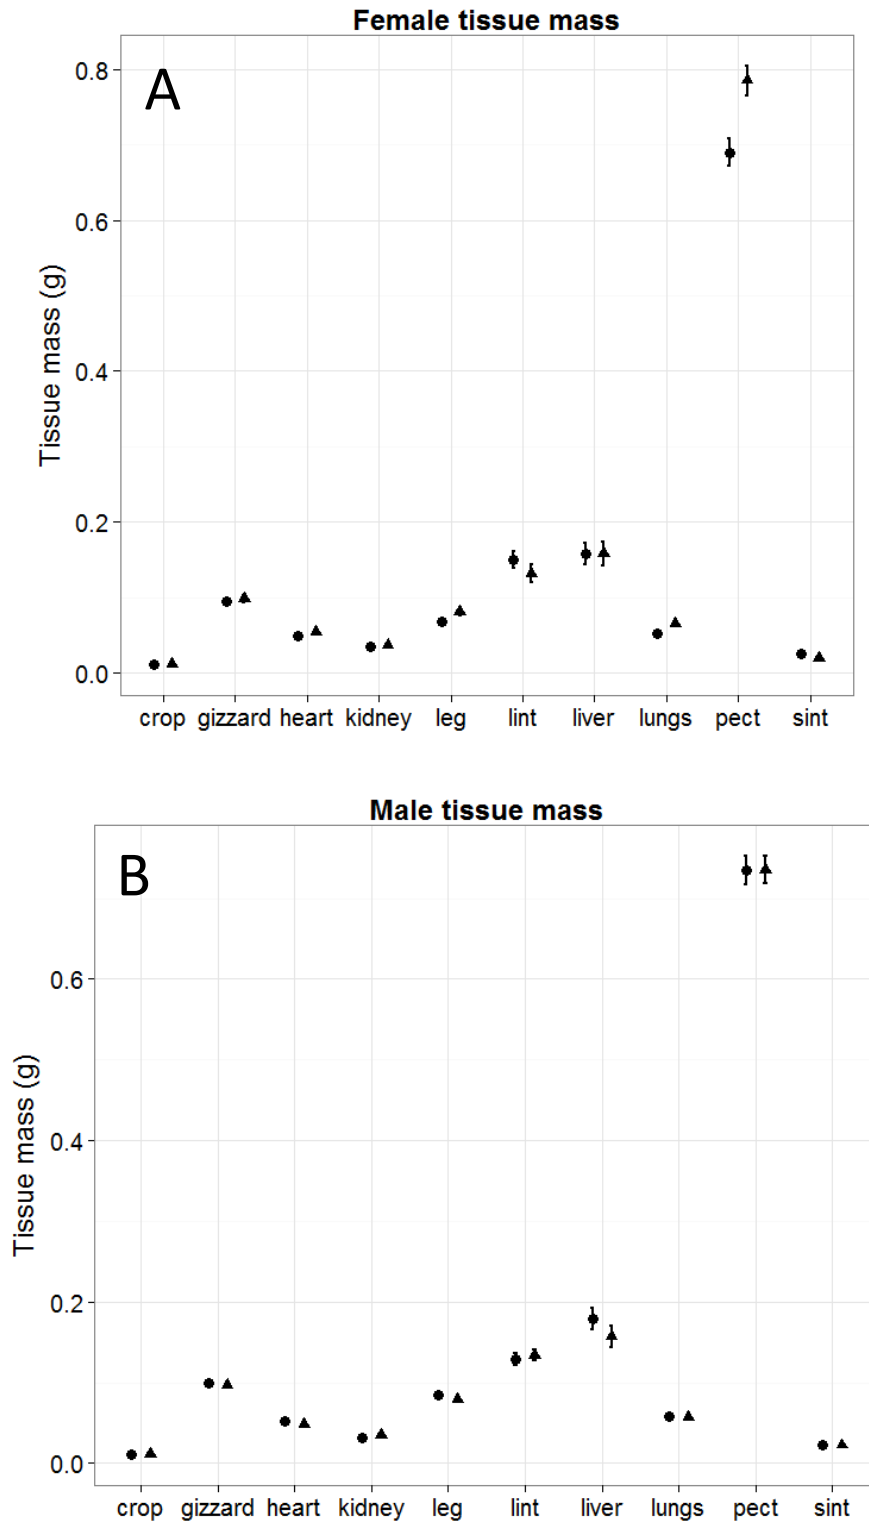

Fig S3. Day 3 and Day 60 data for (A) body mass, (B) basal metabolic rate (BMR), (C) hematocrit (Hct) and (D) hemoglobin (Hb), using pre-treatment (Day 0) values as covariate. Filled circles and solid lines represent CTR birds; Filled triangles and dashed lines represent HF birds. Data shown are least-squared means  $\pm$  s.e.

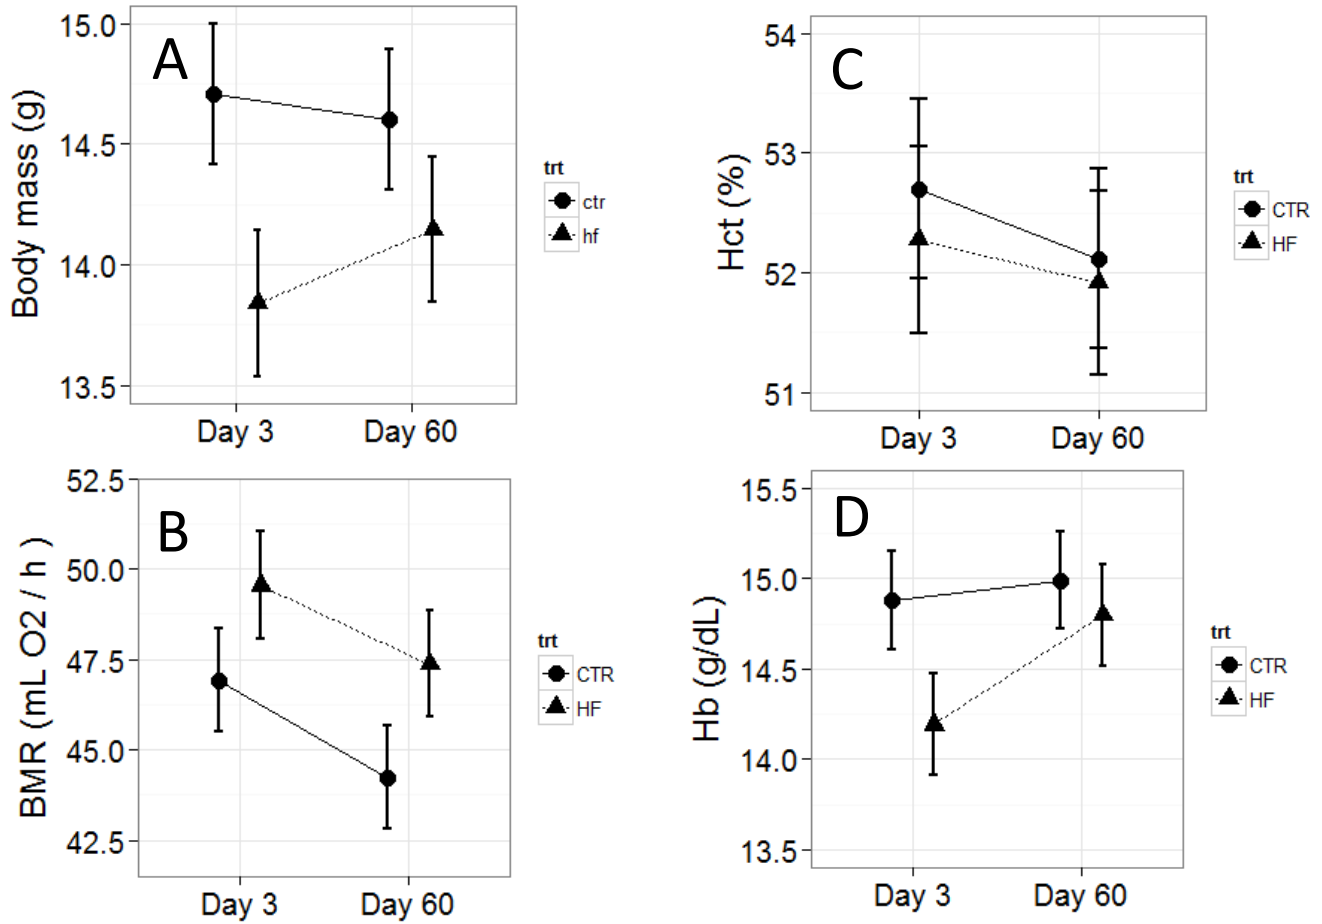

Table S1. Sample sizes for each physiological measurement (organized by sex and treatment)

|                           | HF Male | HF Female | CTR Male | CTR Female |
|---------------------------|---------|-----------|----------|------------|
| BMR                       | 18      | 9         | 18       | 11         |
| Hct                       | 18      | 9         | 18       | 11         |
| Hb                        | 18      | 9         | 18       | 11         |
| Body composition          | 18      | 9         | 16       | 11         |
| Glucose                   | 10      | 6         | 8        | 5          |
| Triglyceride and glycerol | 15      | 7         | 7        | 8          |
| OXY                       | 16      | 8         | 13       | 11         |
| dROMs                     | 15      | 8         | 9        | 8          |

Table S2. Statistical model showing Time by Treatment interaction in body mass, BMR, hematocrit, hemoglobin, and glucose, and treatment effect on behavior, immediate food consumption, tissue masses, glycerol, triglyceride, OXY and dROMs. Data shown are least-squared means  $\pm$  s.e. with both sexes pooled.

| Trait                          | Pre-trt          |                  | Day 3            |                  | Day 60           |                  | Day 90               |                       | Random factor | Estimated Variance | Residual Variance | numDF | denDF | W-value | Z-value | F-value | P-value |
|--------------------------------|------------------|------------------|------------------|------------------|------------------|------------------|----------------------|-----------------------|---------------|--------------------|-------------------|-------|-------|---------|---------|---------|---------|
|                                | CTR              | HF               | CTR              | HF               | CTR              | HF               | CTR                  | HF                    |               |                    |                   |       |       |         |         |         |         |
| Body mass (g)                  | 14.43 $\pm$ 0.29 | 14.37 $\pm$ 0.30 | 14.69 $\pm$ 0.29 | 13.85 $\pm$ 0.30 | 14.60 $\pm$ 0.29 | 14.15 $\pm$ 0.30 | NA                   | NA                    | Bird ID       | 1.930              | 0.468             | 2     | 108   | .       | .       | 4.499   | 0.01    |
| BMR (mL O <sub>2</sub> /h)     | 44.72 $\pm$ 1.32 | 48.42 $\pm$ 1.37 | 47.08 $\pm$ 1.32 | 49.47 $\pm$ 1.38 | 44.39 $\pm$ 1.32 | 47.35 $\pm$ 1.37 | NA                   | NA                    | Bird ID       | 7.491              | 42.834            | 2     | 107   | .       | .       | 0.137   | 0.87    |
| Hematocrit (%)                 | 52.69 $\pm$ 0.72 | 51.30 $\pm$ 0.74 | 52.67 $\pm$ 0.72 | 53.62 $\pm$ 0.75 | 52.05 $\pm$ 0.72 | 51.96 $\pm$ 0.75 | NA                   | NA                    | Bird ID       | 9.479              | 5.500             | 2     | 107   | .       | .       | 1.163   | 0.32    |
| Hemoglobin (g/dL)              | 14.91 $\pm$ 0.26 | 14.35 $\pm$ 0.27 | 14.82 $\pm$ 0.27 | 14.23 $\pm$ 0.28 | 14.92 $\pm$ 0.26 | 14.86 $\pm$ 0.27 | NA                   | NA                    | Bird ID       | 0.937              | 1.079             | 2     | 107   | .       | .       | 1.095   | 0.34    |
| Glucose (mmol/L)               | 15.23 $\pm$ 0.62 | 16.39 $\pm$ 0.56 | 15.27 $\pm$ 0.58 | 14.33 $\pm$ 0.56 | 14.37 $\pm$ 0.59 | 14.32 $\pm$ 0.56 | NA                   | NA                    | Bird ID       | 1.393              | 3.578             | 2     | 53    | .       | .       | 2.225   | 0.12    |
| Trips to feeder                | NA               | NA               | NA               | NA               | NA               | NA               | 1.921 $\pm$ 2.130    | 15.843 $\pm$ 2.209    | .             | .                  | .                 | 1     | 54    | 215     | .       | .       | < 0.01  |
| Time spent resting (s)         | NA               | NA               | NA               | NA               | NA               | NA               | 1106.66 $\pm$ 61.831 | 1011.625 $\pm$ 59.382 | .             | .                  | .                 | 1     | 54    | .       | 1.10    | .       | 0.27    |
| Immediate food consumption (g) | NA               | NA               | NA               | NA               | NA               | NA               | 0.177 $\pm$ 0.029    | 0.275 $\pm$ 0.029     | .             | .                  | .                 | 1     | 54    | 215     | .       | .       | 0.009   |
| Leg muscle mass (g)            | NA               | NA               | NA               | NA               | NA               | NA               | 0.077 $\pm$ 0.003    | 0.080 $\pm$ 0.003     | .             | .                  | .                 | 1     | 52    | .       | -0.79   | .       | 0.43    |
| Flight muscle mass (g)         | NA               | NA               | NA               | NA               | NA               | NA               | 0.719 $\pm$ 0.014    | 0.750 $\pm$ 0.014     | .             | .                  | .                 | 1     | 52    | .       | -1.59   | .       | 0.11    |
| Heart mass (g)                 | NA               | NA               | NA               | NA               | NA               | NA               | 0.509 $\pm$ 0.001    | 0.500 $\pm$ 0.001     | .             | .                  | .                 | 1     | 52    | .       | 0.41    | .       | 0.68    |
| Lung mass (g)                  | NA               | NA               | NA               | NA               | NA               | NA               | 0.055 $\pm$ 0.018    | 0.061 $\pm$ 0.019     | .             | .                  | .                 | 1     | 52    | .       | -1.59   | .       | 0.11    |
| Crop mass (g)                  | NA               | NA               | NA               | NA               | NA               | NA               | 0.012 $\pm$ 0.0008   | 0.011 $\pm$ 0.0008    | .             | .                  | .                 | 1     | 52    | .       | 0.54    | .       | 0.59    |
| S. intestine mass (g)          | NA               | NA               | NA               | NA               | NA               | NA               | 0.023 $\pm$ 0.001    | 0.021 $\pm$ 0.001     | .             | .                  | .                 | 1     | 52    | .       | 1.09    | .       | 0.27    |
| L. intestine mass (g)          | NA               | NA               | NA               | NA               | NA               | NA               | 0.138 $\pm$ 0.007    | 0.132 $\pm$ 0.007     | .             | .                  | .                 | 1     | 52    | .       | 0.59    | .       | 0.56    |
| Gizzard mass (g)               | NA               | NA               | NA               | NA               | NA               | NA               | 0.097 $\pm$ 0.003    | 0.096 $\pm$ 0.003     | .             | .                  | .                 | 1     | 52    | .       | -0.10   | .       | 0.92    |
| Liver mass (g)                 | NA               | NA               | NA               | NA               | NA               | NA               | 0.171 $\pm$ 0.01     | 0.157 $\pm$ 0.01      | .             | .                  | .                 | 1     | 52    | .       | 1.01    | .       | 0.31    |
| Kidney mass (g)                | NA               | NA               | NA               | NA               | NA               | NA               | 0.033 $\pm$ 0.002    | 0.035 $\pm$ 0.002     | .             | .                  | .                 | 1     | 52    | .       | -0.73   | .       | 0.47    |
| Glycerol (mmol/L)              | NA               | NA               | NA               | NA               | NA               | NA               | 0.950 $\pm$ 0.155    | 1.067 $\pm$ 0.127     | .             | .                  | .                 | 1     | 35    | .       | -0.57   | .       | 0.57    |
| Triglyceride (mmol/L)          | NA               | NA               | NA               | NA               | NA               | NA               | 4.611 $\pm$ 0.362    | 4.527 $\pm$ 0.296     | .             | .                  | .                 | 1     | 35    | .       | 0.18    | .       | 0.86    |

|                                            |    |    |    |    |    |    |                   |                   |   |   |   |   |    |   |       |   |      |
|--------------------------------------------|----|----|----|----|----|----|-------------------|-------------------|---|---|---|---|----|---|-------|---|------|
| OXY<br>(mmol/L<br>HOCl<br>neutralized<br>) | NA | NA | NA | NA | NA | NA | 243.06 ±<br>9.803 | 233.28 ±<br>9.803 | . | . | . | 1 | 46 | . | 0.70  | . | 0.48 |
| dROMs<br>(mmol/L<br>H2O2<br>equivalent)    | NA | NA | NA | NA | NA | NA | 4.919 ±<br>0.318  | 5.769 ±<br>0.253  | . | . | . | 1 | 38 | . | -2.11 | . | 0.03 |
